# Supplementary material for: Histidine-directed synthesis and optical properties of two indium phosphite–oxalates with three-dimensional structures
Source: Royal Society of Chemistry journal article supplement (doi:10.1039/d4ce01135j), 2025-01-01
Supplement: d4ce01135j1.pdf [file d4ce01135j1.pdf]

Electronic Supporting Information

**Histidine-directed synthesis and optical properties of two indium phosphite-oxalates with three-dimensional structures†**

Xuemei Wen,<sup>a</sup> Ying Li,<sup>b</sup> Yan Zhao,<sup>b</sup> Jing Li,<sup>\*a</sup> Hongmei Zeng,<sup>a</sup> Guohong Zou<sup>a</sup> and Zhien Lin<sup>\*a</sup>

<sup>a</sup> College of Chemistry, Sichuan University, Chengdu 610064, P. R. China

<sup>b</sup> College of Chemistry and Materials Science, Sichuan Normal University, Chengdu 610068, P. R. China

\* To whom correspondence should be addressed. Tel: +86-28-85412284. E-mail:

jingli@scu.edu.cn; zhienlin@scu.edu.cn.

## Synthesis

The starting material  $\text{In}(\text{OH})_3$ , L-histidine,  $\text{H}_3\text{PO}_3$ , and  $\text{H}_2\text{C}_2\text{O}_4 \cdot 2\text{H}_2\text{O}$  were commercially available with analytical grade and used without further processing.

$\text{In}_2(\text{C}_6\text{H}_{10}\text{N}_3\text{O}_2)(\text{HPO}_3)_2(\text{C}_2\text{O}_4)_{1.5} \cdot 0.5\text{H}_2\text{O}$  (**1**) was prepared by heating a mixture of  $\text{In}(\text{OH})_3$  (0.166 g, 1 mmol), L-histidine (0.155 g, 1 mmol),  $\text{H}_3\text{PO}_3$  (0.082 g, 1 mmol), and  $\text{H}_2\text{C}_2\text{O}_4 \cdot 2\text{H}_2\text{O}$  (0.378 g, 3 mmol) in a 25 mL Teflon-lined stainless steel autoclave at 150 °C for 10 days. After cooling to room temperature, plate crystals of compound **1** were separated from the resulting product by filtration, washed with distilled water, and dried in air (43% yield based on Indium).

$(\text{C}_6\text{H}_{11}\text{N}_3\text{O}_2) \cdot [\text{In}_4(\text{C}_6\text{H}_{10}\text{N}_3\text{O}_2)(\text{HPO}_3)_5(\text{H}_2\text{PO}_3)(\text{C}_2\text{O}_4)_2]$  (**2**) was prepared by heating a mixture of  $\text{In}(\text{OH})_3$  (0.166 g, 1 mmol), L-histidine (0.155 g, 1 mmol),  $\text{H}_3\text{PO}_3$  (0.205 g, 2.5 mmol), and  $\text{H}_2\text{C}_2\text{O}_4 \cdot 2\text{H}_2\text{O}$  (0.378 g, 3 mmol) in a 25 mL Teflon-lined stainless steel autoclave at 150 °C for 10 days. After cooling to room temperature, prismatic crystals of compound **2** were separated from the resulting product by filtration, washed with distilled water, and dried in air (48% yield based on Indium).

## Single crystal X-ray diffraction

Single crystal X-ray diffraction data were collected on a Bruker APEX-II CCD diffractometer with  $\text{Mo-K}\alpha$  radiation ( $\lambda = 0.71073 \text{ \AA}$ ) at room temperature. The crystal structures were solved by direct methods. The structures were refined on  $F^2$  by full-matrix least-squares methods using the SHELXTL program package.<sup>1,2</sup>

## Powder X-ray diffraction

Powder XRD data were obtained using a Shimadzu XRD-6100 diffractometer with  $\text{Cu-K}\alpha$  radiation ( $\lambda = 1.5418 \text{ \AA}$ ), in the angular range of  $2\theta = 5\text{-}50^\circ$ , and with a scan step width of  $0.02^\circ$  and a fixed time of 0.2 s.

## IR spectroscopy

IR spectra of compounds **1** and **2** were obtained on a Nicolet Impact 410 FTIR spectrometer by using KBr pellets, with transmission mode from 4000 to  $400 \text{ cm}^{-1}$ .

## UV-vis diffuse reflectance spectroscopy

The UV-vis diffuse reflectance spectra of the two compounds were recorded at room temperature on a Shimadzu UV-2600 UV-vis spectrophotometer in the wavelength range of 200-800 nm.  $\text{BaSO}_4$

powder was used as 100% reflectance reference. The Kubelka-Munk function was used to calculate the absorption spectra from the reflection spectra:  $F(R) = \alpha/S = (1-R)^2/2R$ , where  $R$  is the reflectance,  $\alpha$  is the absorption coefficient, and  $S$  is the scattering coefficient.<sup>3,4</sup>

### **SHG tests**

A Q-switched Nd:YAG laser was used to measure the SHG signals of the sieved samples under 1064 nm radiation based on Kurtz–Perry method.<sup>5</sup>

### **Birefringence measurement**

The birefringences of compounds **1** and **2** were characterized by using the polarizing microscope equipped (ZEISS Axio Scope. A1) with a Berek compensator.

### **Luminescence performance measurement**

The photoluminescence (PL) properties and PLQY of compounds **1** and **2** were characterized using an Edinburgh FS-5 fluorescence spectrometer with a calibrated integrating sphere system. The time-resolved PL decay was measured on a Fluoromax-3 fluorescence spectrometer.

### **Computational methods**

In order to understand the relationship between structure and properties of the two compounds, the first-principles calculations were carried out by using the CASTEP.<sup>6</sup> The generalized gradient approximation (GGA) with Perdew-Burke-Ernzerhof (PBE) was used for all the calculations.<sup>7</sup> All the atoms were performed by Norm-conserving pseudopotentials (NCP), with H 1s, C 2s<sup>2</sup>2p<sup>2</sup>, N 2s<sup>2</sup>2p<sup>3</sup>, O 2s<sup>2</sup>2p<sup>4</sup>, P 3s<sup>2</sup>3p<sup>3</sup>, In 5s<sup>2</sup>5p<sup>1</sup> treated as valence electrons.<sup>8</sup> The kinetic energy cutoff of 750 eV and the k-point sampling of 4 × 4 × 3 were chosen for compound **1** and the k-point sampling of 4 × 1 × 4 were chosen for compound **2**.<sup>9</sup> All other parameter settings are CASTEP default values.

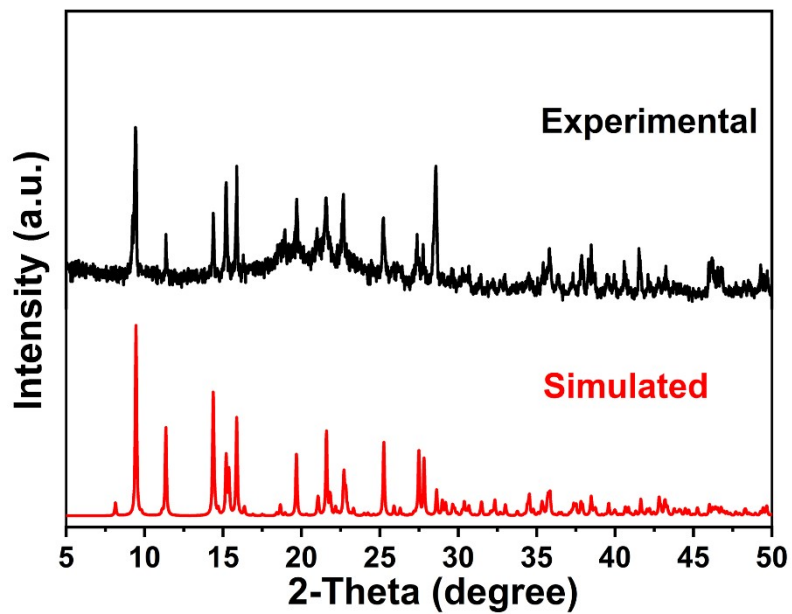

**Fig. S1** Experimental and simulated XRD patterns for compound 1.

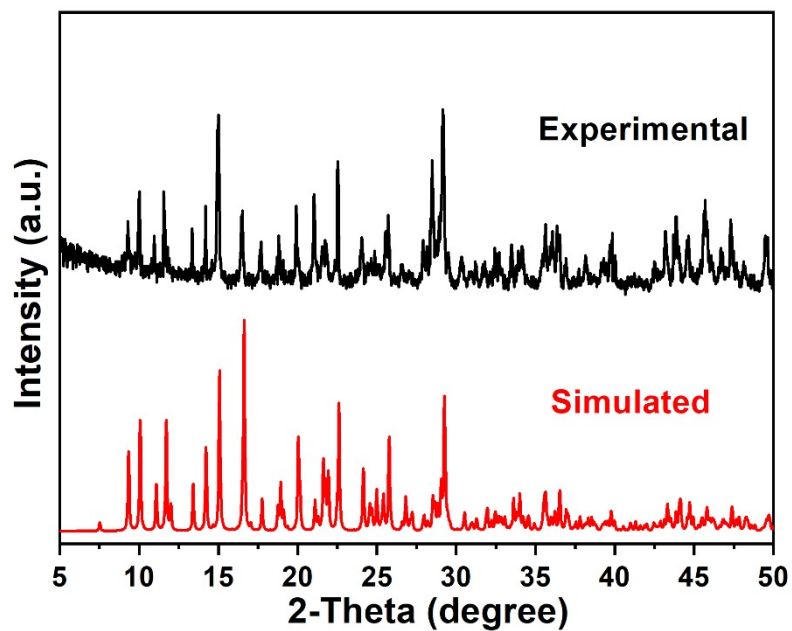

**Fig. S2** Experimental and simulated XRD patterns for compound 2.

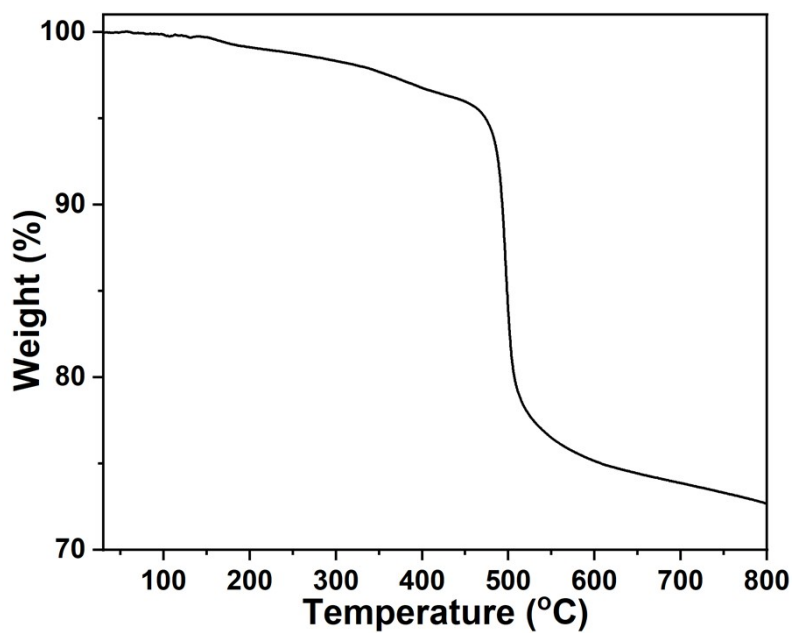

**Fig. S3** TGA analysis of compound **1** under N<sub>2</sub> atmosphere.

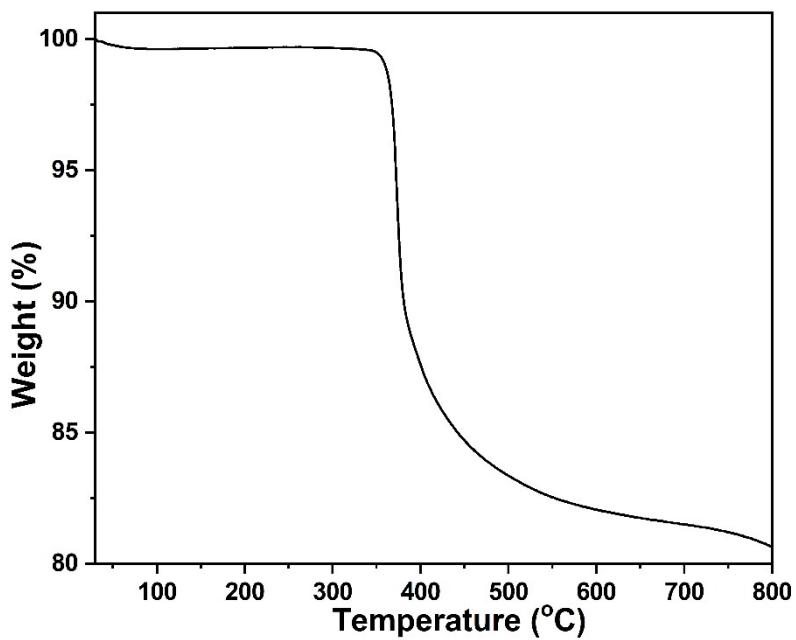

**Fig. S4** TGA analysis of compound **2** under N<sub>2</sub> atmosphere.

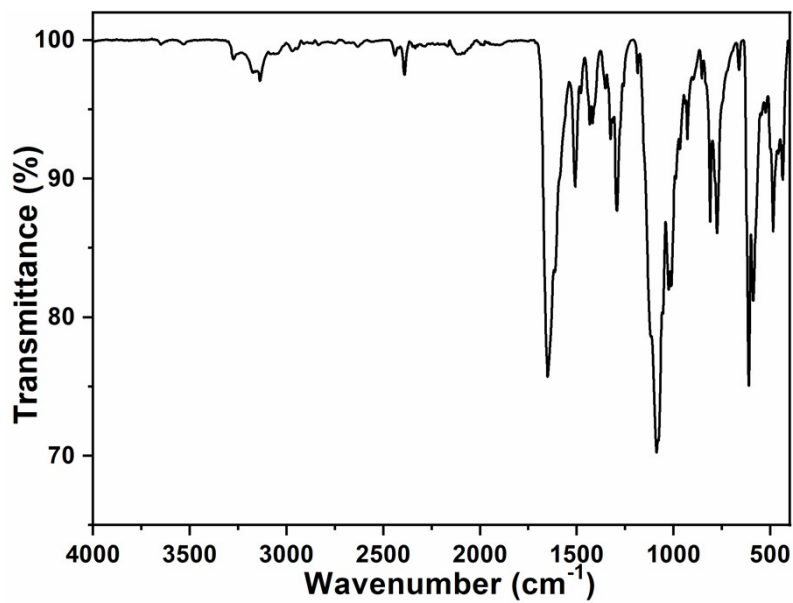

**Fig. S5** The IR spectrum of compound **1**.

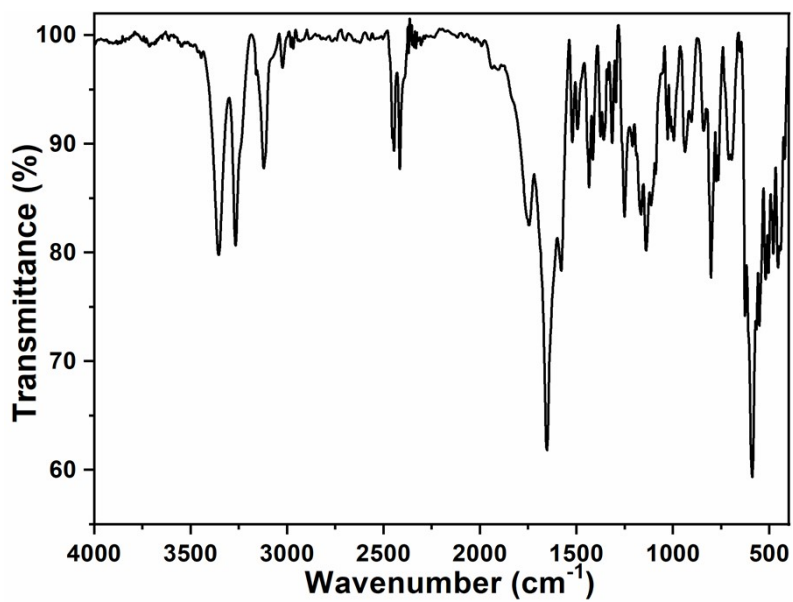

**Fig. S6** The IR spectrum of compound **2**.

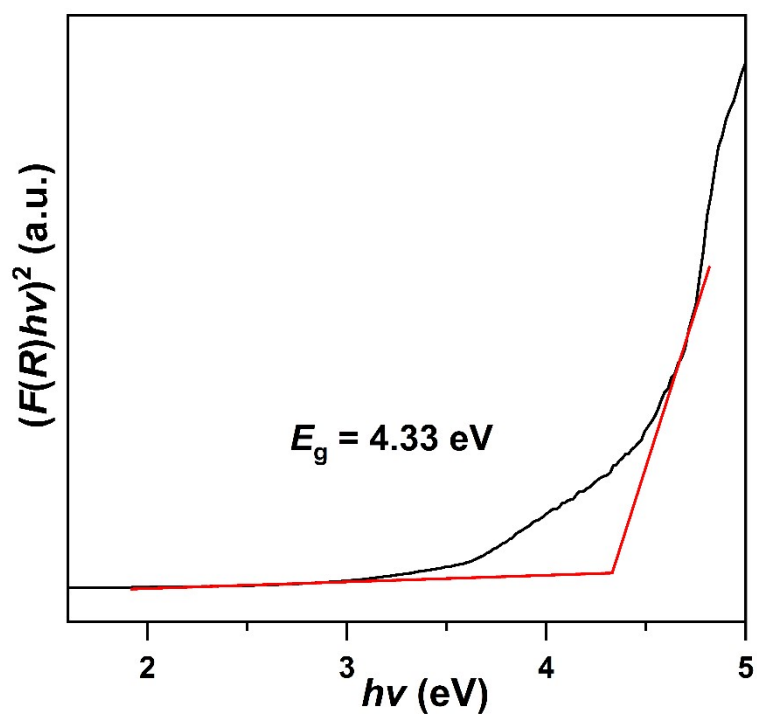

**Fig. S7** Tauc plot of  $[F(R)hv]^2$  versus  $hv$  for the optical band gap of compound 1.

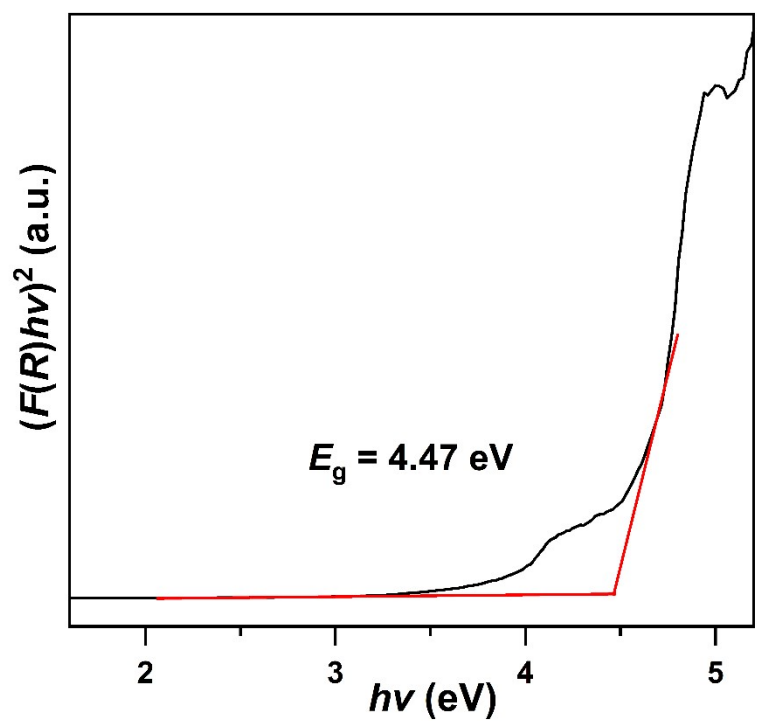

**Fig. S8** Tauc plot of  $[F(R)hv]^2$  versus  $hv$  for the optical band gap of compound 2.

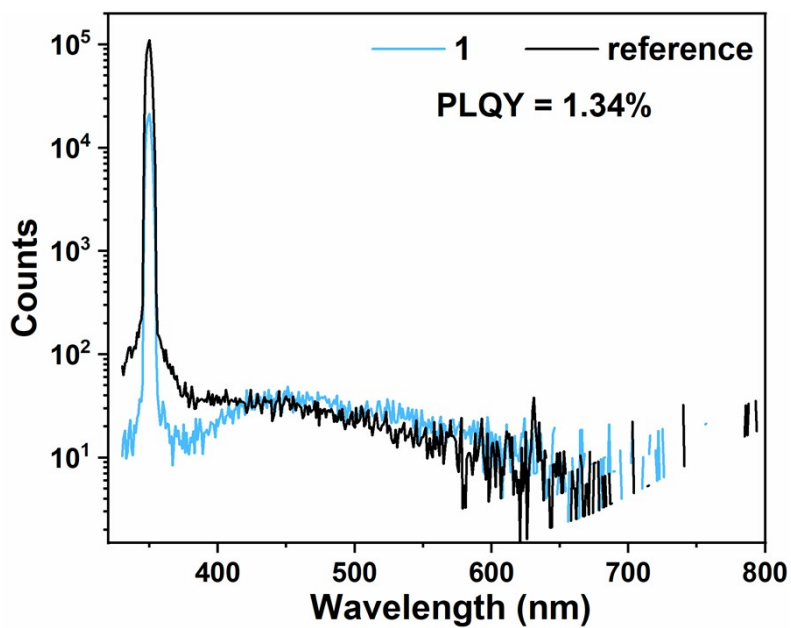

**Fig. S9** The photoluminescence quantum yield (PLQY) diagram of compound 1.

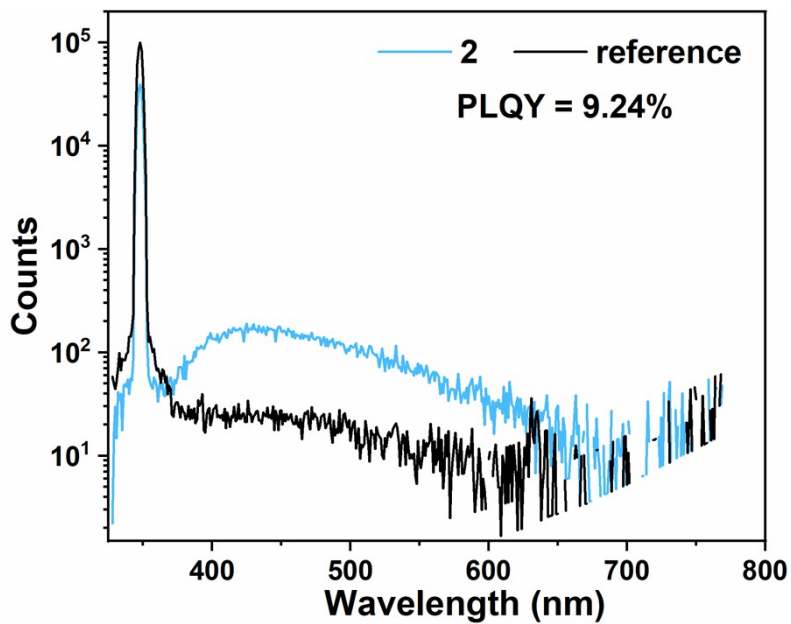

**Fig. S10** The photoluminescence quantum yield (PLQY) diagram of compound 2.



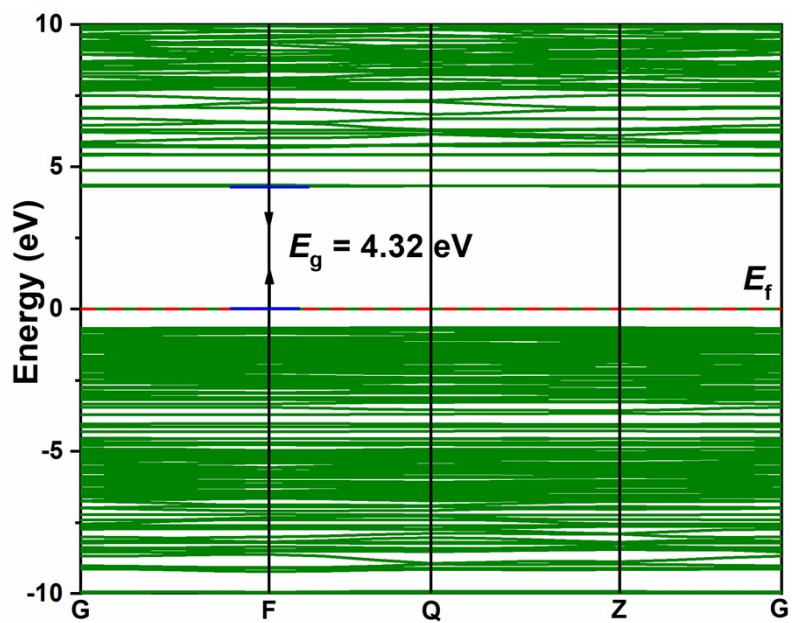

**Fig. S11** Calculated band structure of compound 1 (the Fermi level is set at 0 eV).

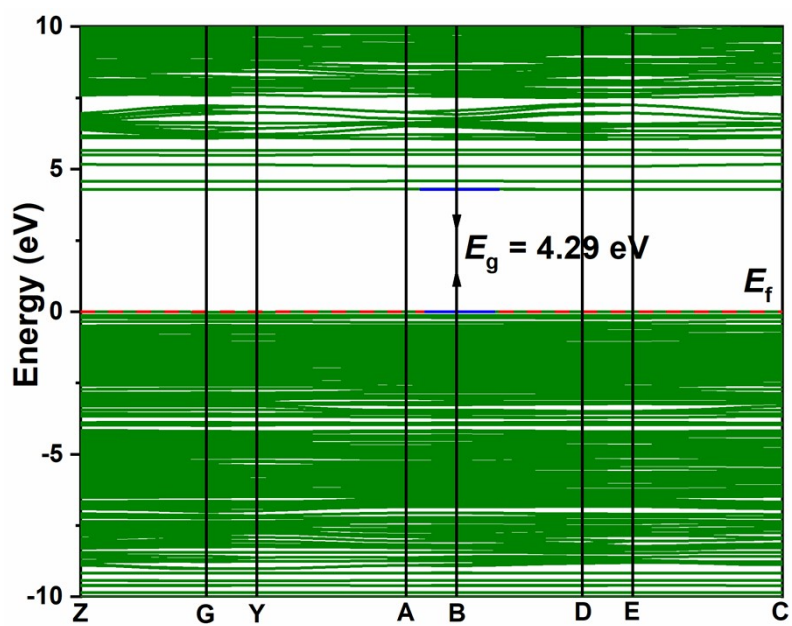

**Fig. S12** Calculated band structure of compound 2 (the Fermi level is set at 0 eV).

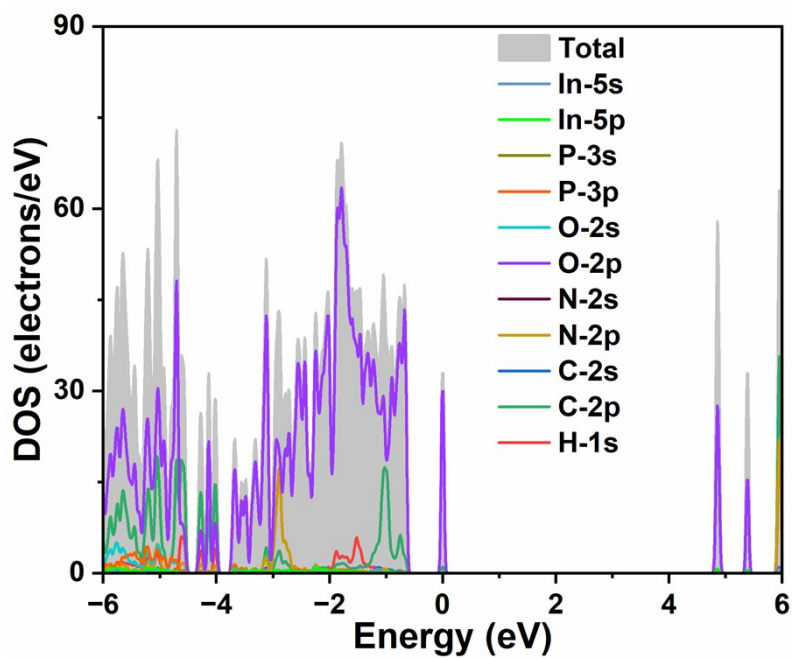

Fig. S13 Total and partial DOSs for compound 1.

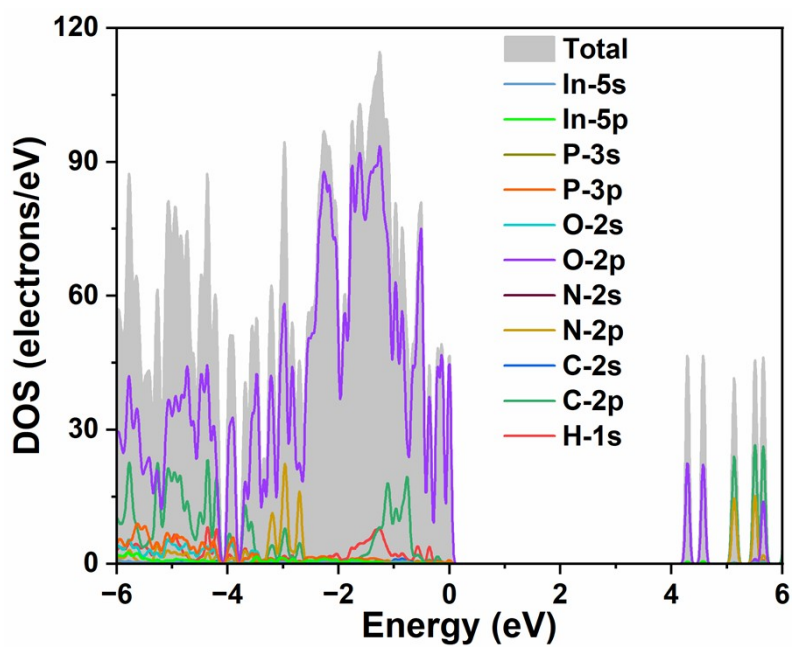

Fig. S14 Total and partial DOSs for compound 2.

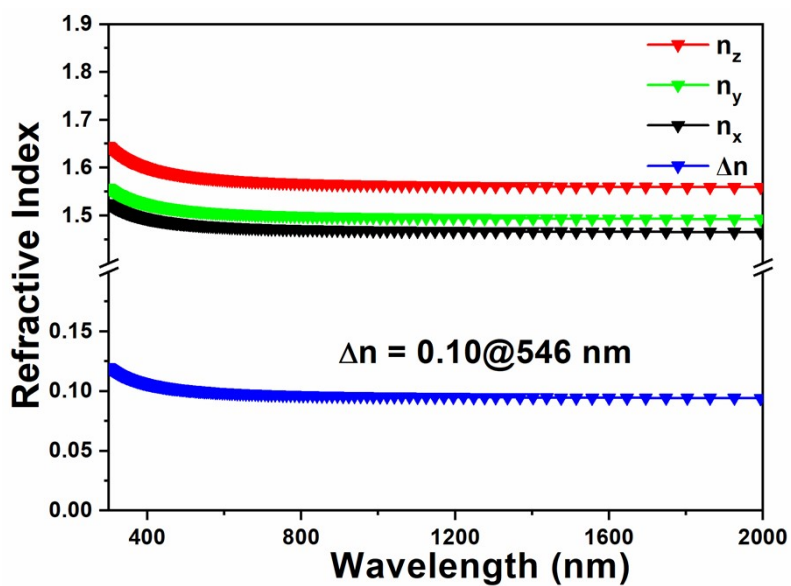

**Fig. S15** Calculated dispersion of refractive index curves and birefringence of compound 1.

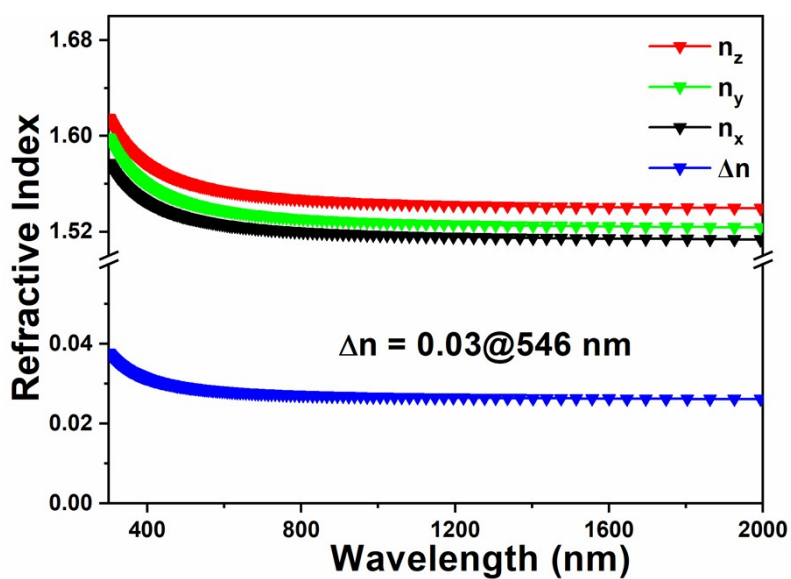

**Fig. S16** Calculated dispersion of refractive index curves and birefringence of compound 2.

## References

1. G. M. Sheldrick, *Acta Crystallogr., Sect. A: Found. Adv.*, 2015, **71**, 3.
2. G. M. Sheldrick, *Acta Crystallogr., Sect. C: Struct. Chem.*, 2015, **71**, 3.
3. P. Kubelka and F. Z. Munk, *Tech. Phys.*, 1931, **12**, 593.
4. J. Tauc, *Mater. Res. Bull.*, 1970, **5**, 721.
5. S. K. Kurtz and T. T. Perry, *J. Appl. Phys.*, 1968, **39**, 3798.
6. M. D. Segall, P. J. D. Lindan, M. J. Probert, C. J. Pickard, P. J. Hasnip, S. J. Clark and M. C. Payne, *Journal of Physics: Condensed Matter*, 2002, **14**, 2717.
7. J. P. Perdew, K. Burke and M. Ernzerhof, *Phys. Rev. Lett.*, 1996, **77**, 3865.
8. K. Kobayashi, *Computational Materials Science*, 1999, **14**, 72.
9. D. Vanderbilt, *Physical Review B*, 1990, **41**, 7892.
